# Supplementary material for: Effects of Hydrothermal Processing on Volatile and Fatty Acids Profile of Cowpeas (Vigna unguiculata), Chickpeas (Cicer arietinum) and Kidney Beans (Phaseolus vulgaris)
Source: MDPI journal article supplement (doi:10.3390/molecules27238204), 2022-11-24
Supplement: s1 [file s1]

# Effects of Hydrothermal Processing on Fatty Acids and Volatile Profile of Cowpeas (*Vigna unguiculata*), Chickpeas (*Cicer arietinum*) and Kidney Beans (*Phaseolus vulgaris*): A Fingerprinting Approach

Prit Khrisanapant <sup>1,2</sup>, Biniam Kebede <sup>1,\*</sup>, Sze Ying Leong <sup>1,2</sup> and Indrawati Oey <sup>1,2,\*</sup>

<sup>1</sup> Department of Food Science, University of Otago, Dunedin 9054, New Zealand

<sup>2</sup> Riddet Institute, Palmerston North 4442, New Zealand

\* Correspondence: biniam.kebede@otago.ac.nz (B.K.); indrawati.oey@otago.ac.nz (I.O.); Tel.: +64-3-479-7257 (B.K)

**Table S1.** Commercial standards for fatty acid methyl ester analysis

| Analyte                                       | CAS Number | Target Concentration |
|-----------------------------------------------|------------|----------------------|
| Butyric acid methyl ester                     | 623-42-7   | 400 µg/mL            |
| Caproic acid methyl ester                     | 106-70-7   | 400 µg/mL            |
| Caprylic acid methyl ester                    | 111-11-5   | 400 µg/mL            |
| Capric acid methyl ester                      | 110-42-9   | 400 µg/mL            |
| Undecanoic acid methyl ester                  | 1731-86-8  | 200 µg/mL            |
| Lauric acid methyl ester                      | 111-82-0   | 400 µg/mL            |
| Tridecanoic acid methyl ester                 | 1731-88-0  | 200 µg/mL            |
| Myristic acid methyl ester                    | 124-10-7   | 400 µg/mL            |
| Myristoleic acid methyl ester                 | 56219-06-8 | 200 µg/mL            |
| Pentadecanoic acid methyl ester               | 7132-64-1  | 200 µg/mL            |
| cis-10-Pentadecenoic acid methyl ester        | 90176-52-6 | 200 µg/mL            |
| Palmitic acid methyl ester                    | 112-39-0   | 600 µg/mL            |
| Palmitoleic acid methyl ester                 | 1120-25-8  | 200 µg/mL            |
| Heptadecanoic acid methyl ester               | 1731-92-6  | 200 µg/mL            |
| cis-10-Heptadecenoic acid methyl ester        | 75190-82-8 | 200 µg/mL            |
| Stearic acid methyl ester                     | 112-61-8   | 400 µg/mL            |
| Elaidic acid methyl ester                     | 1937-62-8  | 200 µg/mL            |
| Oleic acid methyl ester                       | 112-62-9   | 400 µg/mL            |
| Linolelaidic acid methyl ester                | 2566-97-4  | 200 µg/mL            |
| Linoleic acid methyl ester                    | 112-63-0   | 200 µg/mL            |
| Arachidic acid methyl ester                   | 1120-28-1  | 400 µg/mL            |
| g-Linolenic acid methyl ester                 | 16326-32-2 | 200 µg/mL            |
| cis-11-Eicosenoic acid methyl ester           | 2/09/2390  | 200 µg/mL            |
| Linolenic acid methyl ester                   | 301-00-8   | 200 µg/mL            |
| Heneicosanoic acid methyl ester               | 6064-90-0  | 200 µg/mL            |
| cis-11,14-Eicosadienoic acid methyl ester     | 7/02/2463  | 200 µg/mL            |
| Behenic acid methyl ester                     | 929-77-1   | 400 µg/mL            |
| Methyl cis-8,11,14-eicosatrienoate            | 21061-10-9 | 200 µg/mL            |
| Erucic acid methyl ester                      | 1120-34-9  | 200 µg/mL            |
| cis-11-14-17-Eicosatrienoic acid methyl ester | 55682-88-7 | 200 µg/mL            |
| Arachidonic acid methyl ester                 | 2566-89-4  | 200 µg/mL            |
| Tricosanoic acid methyl ester                 | 2433-97-8  | 200 µg/mL            |

| Analyte                                               | CAS Number | Target Concentration |
|-------------------------------------------------------|------------|----------------------|
| cis-13,16-Docosadienoic acid methyl ester             | 61012-47-3 | 200 µg/mL            |
| Lignoceric acid methyl ester                          | 2442-49-1  | 400 µg/mL            |
| cis-5,8,11,14,17-Eicosapentaenoic acid methyl ester   | 2734-47-6  | 200 µg/mL            |
| Nervonic acid methyl ester                            | 2733-88-2  | 200 µg/mL            |
| cis-4,7,10,13,16,19-Docosahexaenoic acid methyl ester | 301-01-9   | 200 µg/mL            |

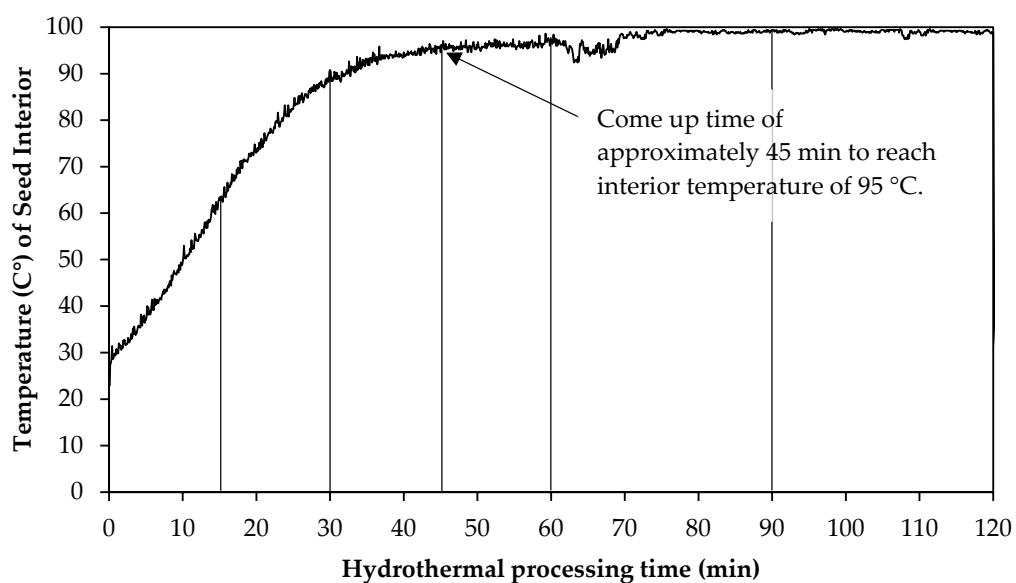

**Figure S1.** Time-temperature profile of seed interior during hydrothermal processing.

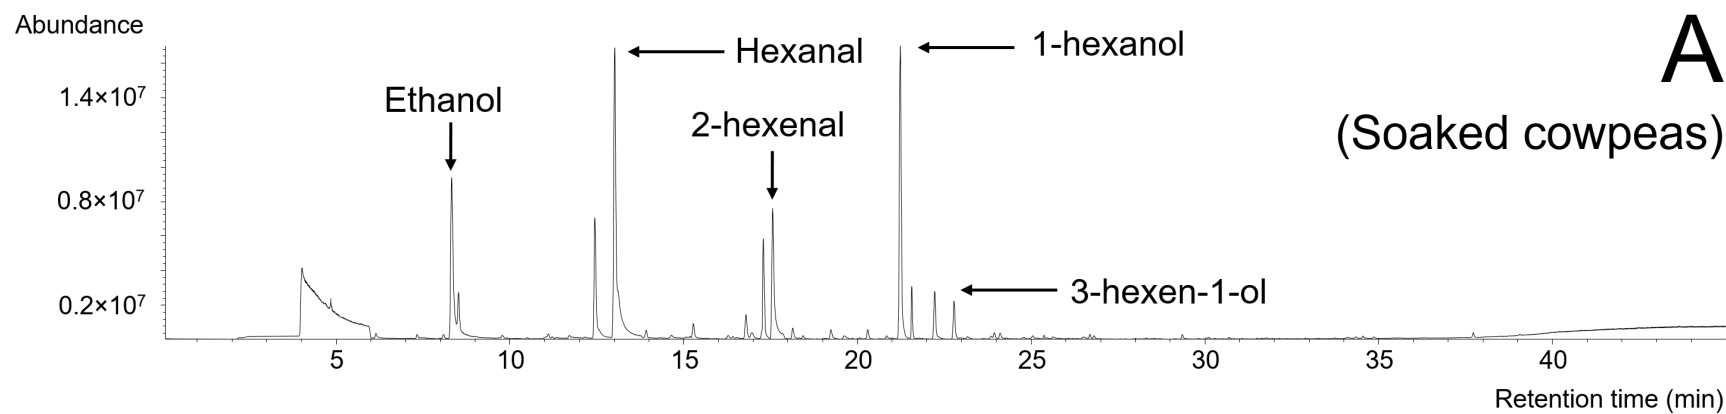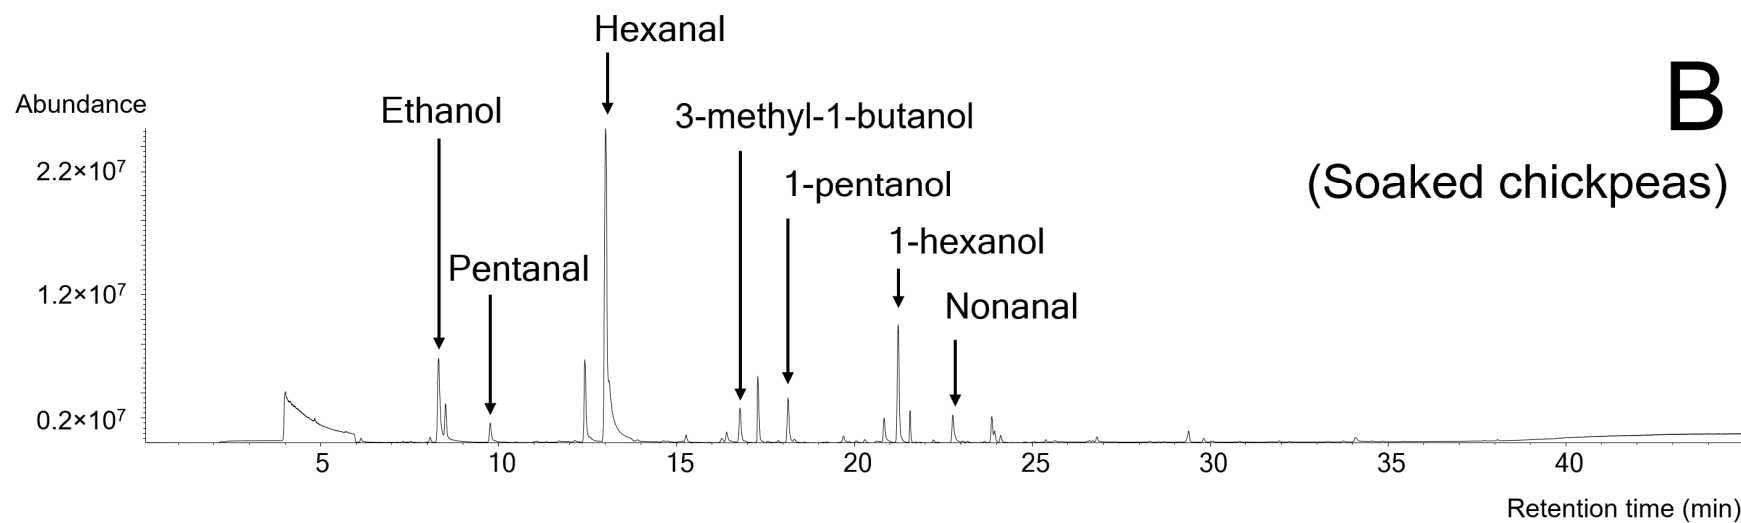

**C**

(Soaked kidney beans)

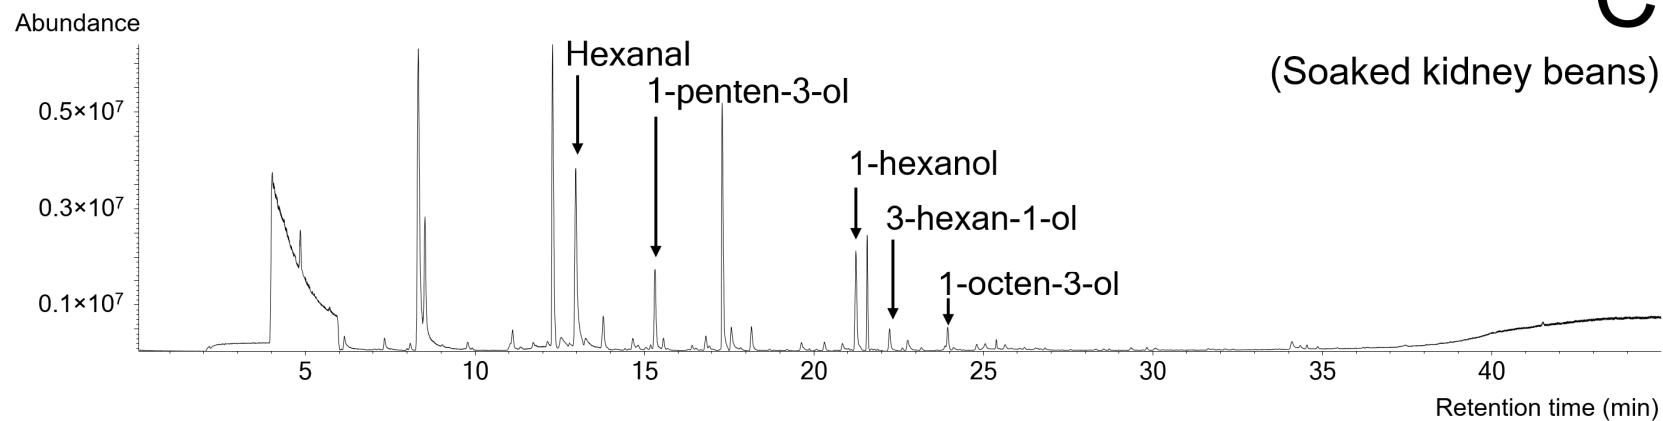**D**

(Processed cowpeas)

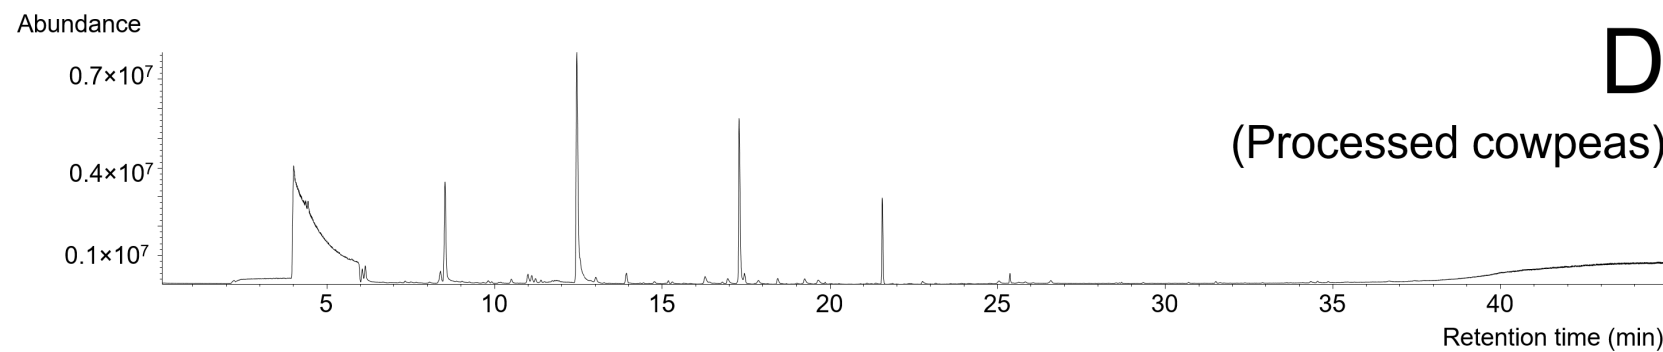

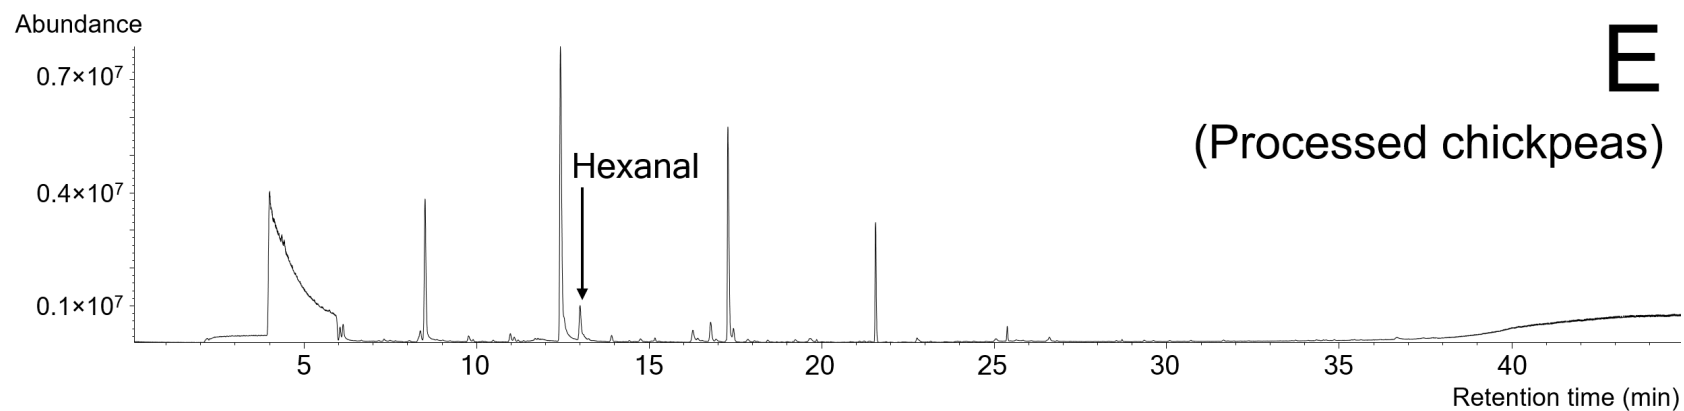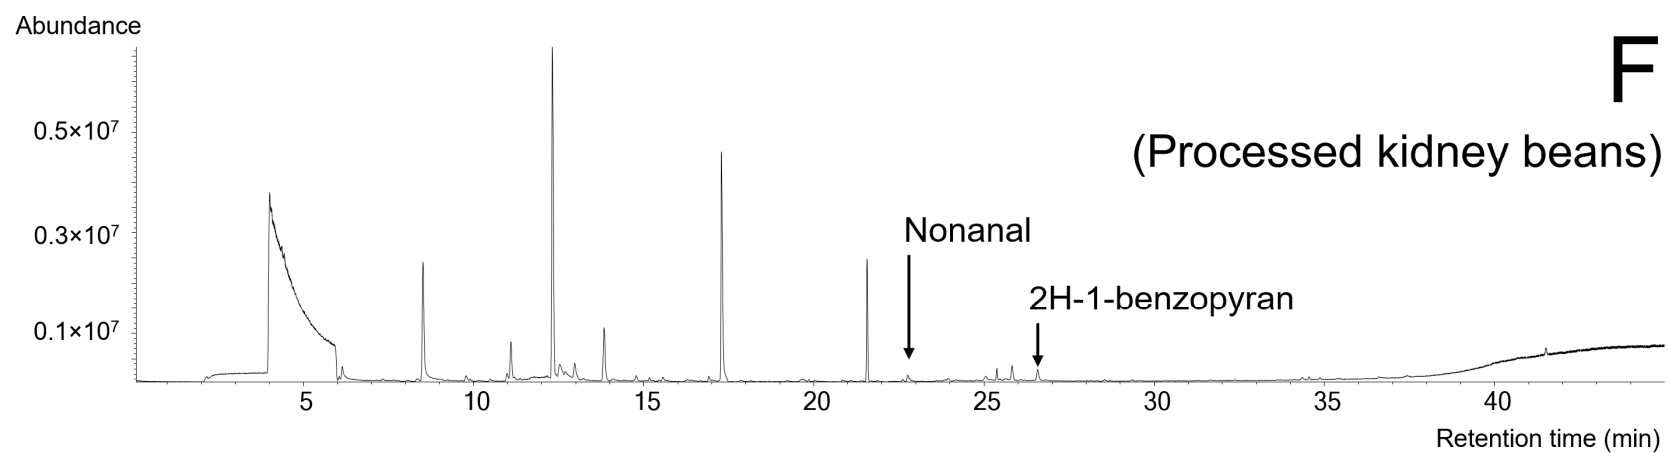

**Figure S2.** Representative total ion chromatograms of cowpeas, chickpeas and kidney beans in the opened system approach. A=soaked cowpeas; B=soaked chickpeas; C=soaked kidney beans; D=processed cowpeas; E=processed chickpeas; F=processed kidney beans.

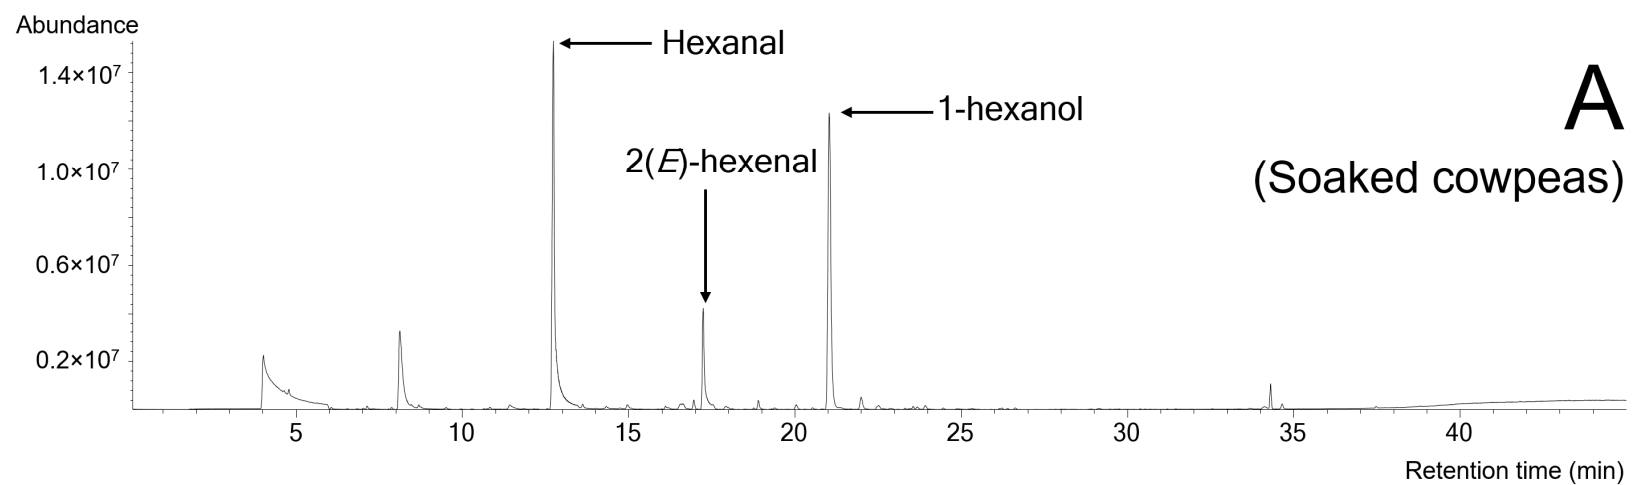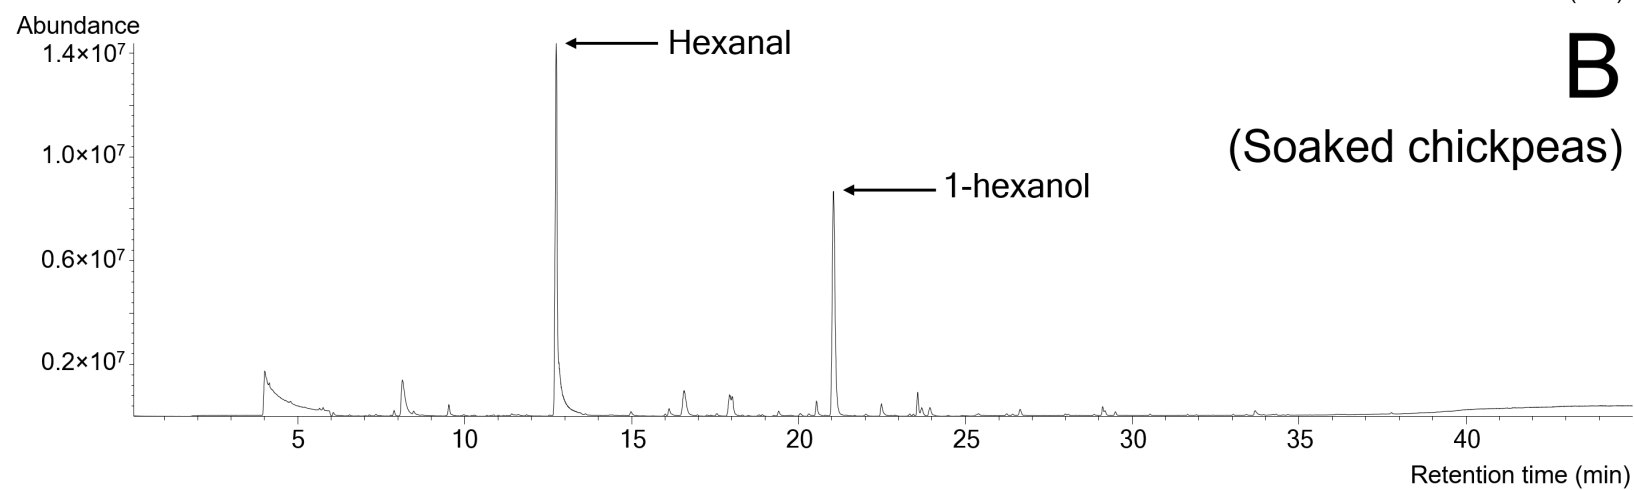

C

(Soaked kidney beans)

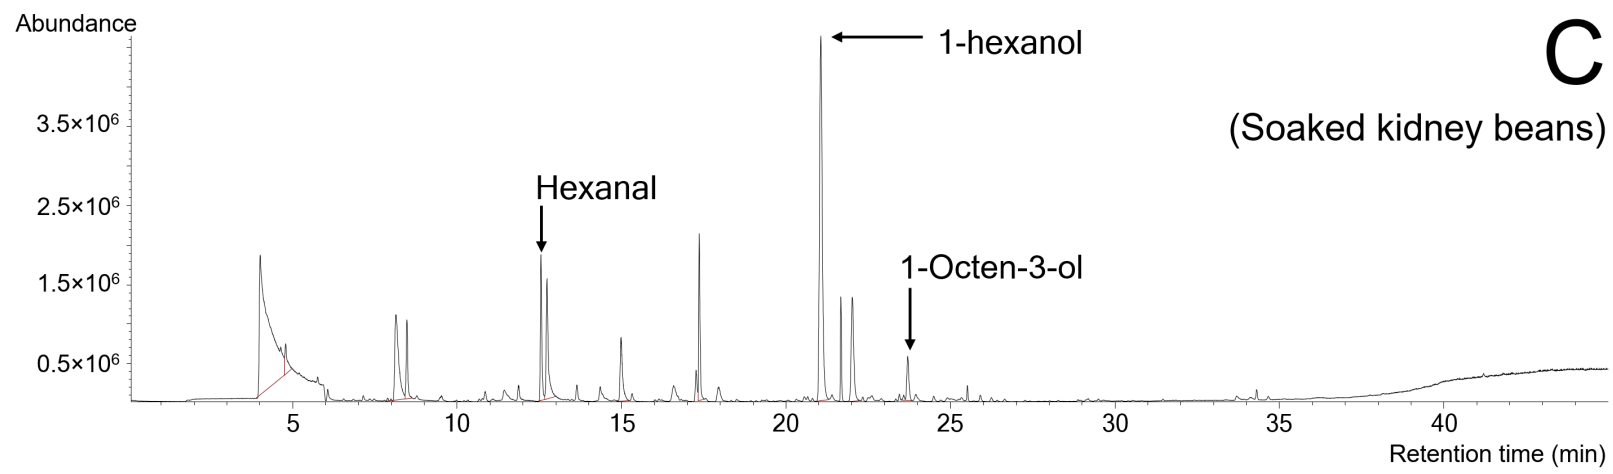

D

(Processed cowpeas)

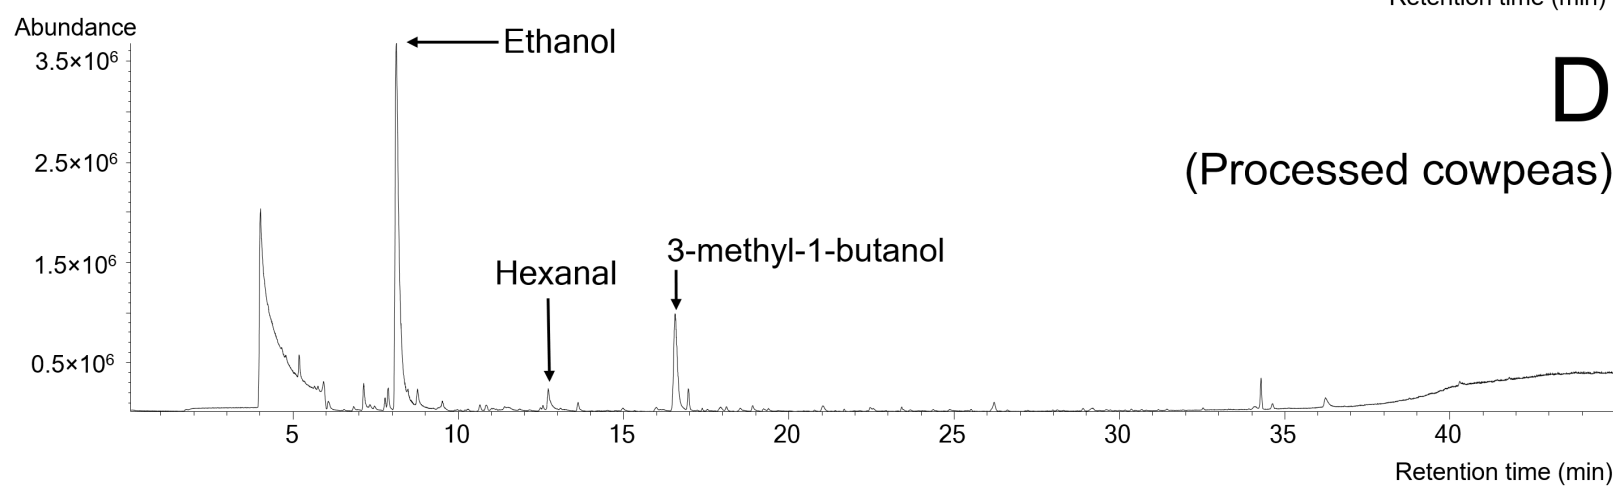

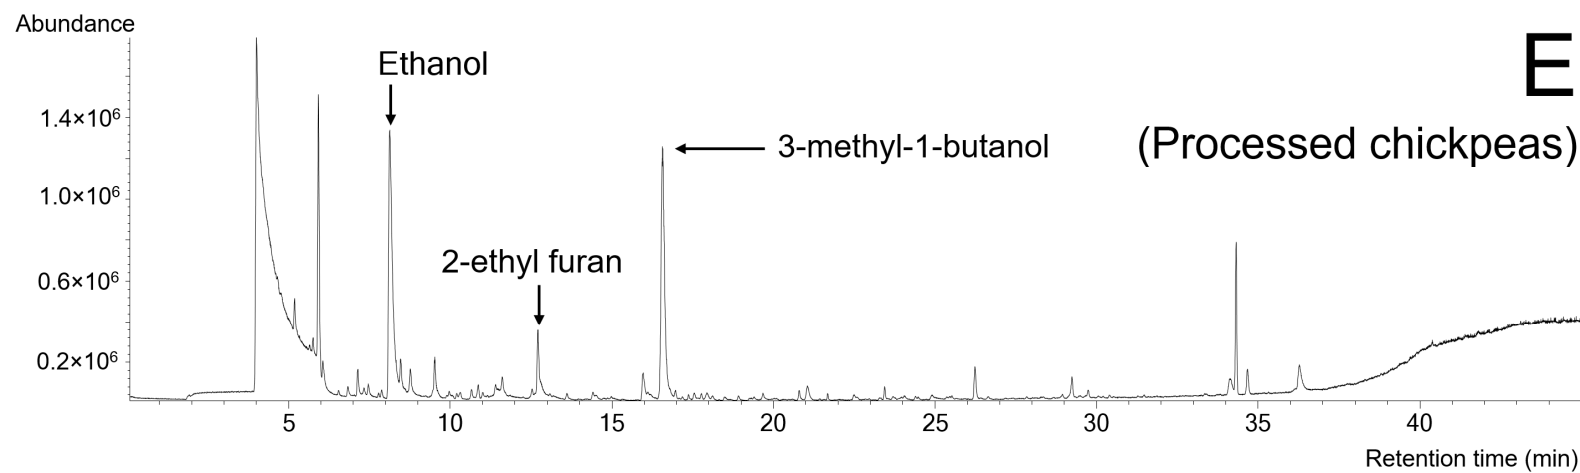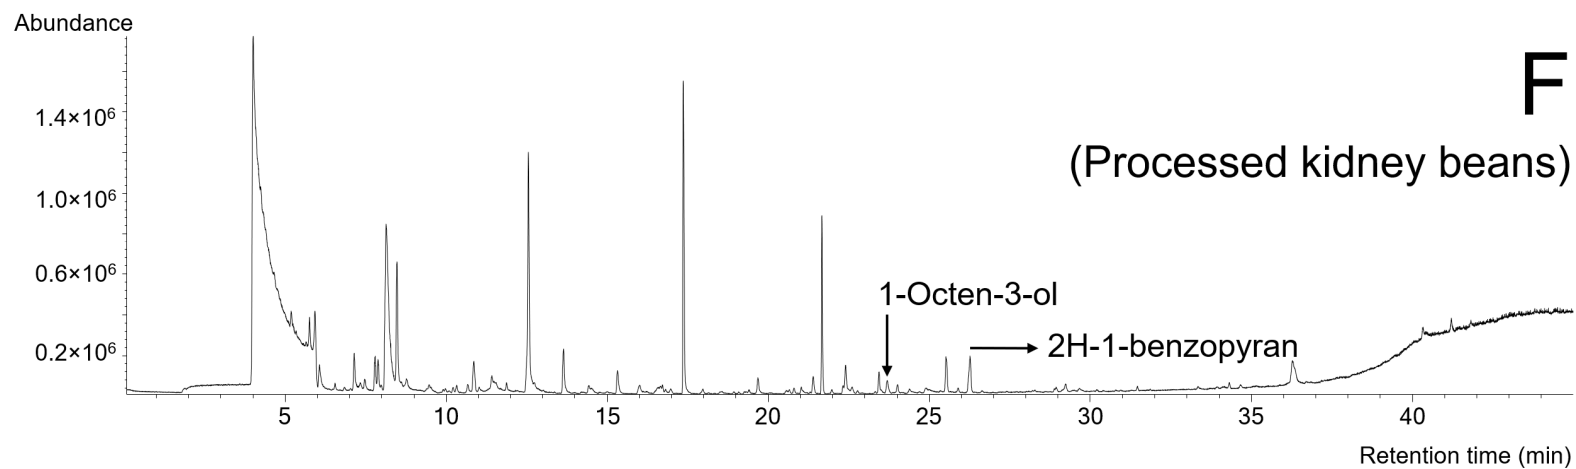

**Figure S3.** Representative total ion chromatograms of cowpeas, chickpeas and kidney beans in the closed system approach. A=soaked cowpeas; B=soaked chickpeas; C=soaked kidney beans; D=processed cowpeas; E=processed chickpeas; F=processed kidney beans.
